# Supplementary material for: Methylprednisolone versus intravenous immune globulin as an initial therapy in adult primary immune thrombocytopenia
Source: PubMed Central journal article supplement — Korean J Intern Med. 2017 Nov 27;34(2):383–9. doi: 10.3904/kjim.2015.070 (PMC6406098; doi:10.3904/kjim.2015.070), 2017-11-27
Supplement: kjim-2015-070-suppl1.pdf [file kjim-2015-070-suppl1.pdf]

**Supplementary Table 1. Number of patients and dose of platelet transfusion in the initial treatment**

| Variable                           | Methyl-Pd arm<br>(n = 39) | IVIg arm<br>(n = 38) | p value |
|------------------------------------|---------------------------|----------------------|---------|
| Patients                           | 12 (30.8)                 | 15 (39.5)            | 0.424   |
| Dose ( $\times 10^{11}$ platelets) | 2.43 $\pm$ 4.16           | 2.82 $\pm$ 3.80      | 0.669   |

Values are presented as number (%) or mean  $\pm$  SD.  
Methyl-Pd, methylprednisolone; IVIg, intravenous immune globulin.
